# Supplementary material for: In Vivo Serotonin 5-HT2A Receptor Availability and Its Relationship with Aggression Traits in Healthy Individuals: A Positron Emission Tomography Study with C-11 MDL100907
Source: MDPI journal article supplement (doi:10.3390/ijms242115697), 2023-10-28
Supplement: s1 [file s1]

## Supplementary Materials

**Supplementary Table S1.** Sex differences in aggression traits

| <b>Aggression traits</b> | <b>Men<br/>(n = 10)</b> | <b>Women<br/>(n = 23)</b> | <b><i>p</i> value</b> |
|--------------------------|-------------------------|---------------------------|-----------------------|
| Physical aggression      | 15.2 (2.9)              | 12.4 (1.9)                | 0.002*                |
| Verbal aggression        | 10.5 (4.0)              | 8.4 (1.9)                 | 0.143                 |
| Anger                    | 9.1 (1.4)               | 9.7 (2.6)                 | 0.468                 |
| Hostility                | 10.8 (2.1)              | 10.8 (2.3)                | 0.984                 |
| Total                    | 45.6 (6.9)              | 41.4 (6.1)                | 0.085                 |

The aggression scores were indicated as mean (standard deviation), and *p* values were calculated using independent samples *t*-tests. An asterisk presents statistical significance at  $p < 0.05$ .

**Supplementary Table S2.** Results of voxel-based correlation analysis between [ $^{11}\text{C}$ ]MDL100907 BP<sub>ND</sub> values and age

| Correlation          | MNI coordinate (x, y, z) | Brain region                                   | Cluster size (voxels) | T value | p value |
|----------------------|--------------------------|------------------------------------------------|-----------------------|---------|---------|
| Negative correlation | 2, 28, 48                | Right superior frontal gyrus (medial part)     | 1137                  | 5.79    | <0.001  |
|                      | -2, 52, 26               | Left superior frontal gyrus (medial part)      |                       | 5.37    |         |
|                      | 6, 22, 56                | Right supplementary motor area                 |                       | 4.83    |         |
|                      | -54, -36, 50             | Left inferior parietal gyrus                   | 192                   | 5.51    | 0.001   |
|                      | -44, -30, 54             | Left postcentral gyrus                         |                       | 3.97    |         |
|                      | -42, -42, 58             |                                                |                       | 3.28    |         |
|                      | 48, -44, 52              | Right inferior parietal gyrus                  | 522                   | 5.37    | <0.001  |
|                      | 48, -26, 52              | Right postcentral gyrus                        |                       | 5.13    |         |
|                      | 56, -18, 16              | Right Rolandic operculum                       |                       | 4.33    |         |
|                      | -46, 40, -8              | Left inferior frontal gyrus (orbital part)     | 56                    | 5.23    |         |
|                      | 34, 22, -14              | Right inferior frontal gyrus (orbital part)    | 301                   | 5.09    |         |
|                      | 48, 18, 2                | Right inferior frontal gyrus (triangular part) |                       | 4.9     |         |
|                      | 40, 12, -14              | Right insula                                   |                       | 4.62    |         |
|                      | 0, -28, 38               | Left median cingulate and paracingulate gyri   | 504                   | 4.92    |         |
|                      | 4, -34, 50               | Right median cingulate and paracingulate gyri  |                       | 4.38    |         |
|                      | 0, -26, 46               | Left median cingulate and paracingulate gyri   |                       | 4.22    |         |
|                      | -22, 4, -18              | Left olfactory cortex                          | 51                    | 4.89    |         |
|                      | -20, -42, 66             | Left postcentral gyrus                         | 314                   | 4.82    |         |
|                      | -34, -62, 54             | Left superior parietal gyrus                   |                       | 4.56    |         |
|                      | -34, -46, 62             |                                                |                       | 4.29    |         |
|                      | -58, -22, -22            | Left inferior temporal gyrus                   | 27                    | 4.78    |         |
|                      | -30, 22, 50              | Left middle frontal gyrus                      | 263                   | 4.76    |         |
|                      | -16, 30, 54              | Left superior frontal gyrus                    |                       | 4.28    |         |
|                      | -30, 4, 56               | Left middle frontal gyrus                      |                       | 4.01    |         |
|                      | -38, 16, -20             | Left temporal pole: superior temporal gyrus    | 118                   | 4.72    |         |
|                      | -38, 20, -12             | Left inferior frontal gyrus (orbital part)     |                       | 3.96    |         |

|  |              |                                                |     |      |        |
|--|--------------|------------------------------------------------|-----|------|--------|
|  | -28, 58, 8   | Left middle frontal gyrus                      |     | 4.57 |        |
|  | -32, 58, -2  | Left superior frontal gyrus (orbital part)     | 121 | 4.22 |        |
|  | -30, 54, 18  | Left middle frontal gyrus                      |     | 4.13 |        |
|  | 42, 46, 14   | Right middle frontal gyrus                     | 87  | 4.55 |        |
|  | 40, 44, 24   |                                                |     | 3.53 | 0.001  |
|  | 18, -24, 68  | Right precentral gyrus                         | 48  | 4.53 | <0.001 |
|  | 22, -14, 66  | Right superior frontal gyrus                   |     | 3.32 | 0.001  |
|  | 10, -28, 68  | Right paracentral lobule                       |     | 3.22 |        |
|  | 32, -68, 40  | Right superior occipital gyrus                 | 57  | 4.53 | <0.001 |
|  | 38, 52, -4   | Right middle frontal gyrus (orbital part)      | 111 | 4.52 |        |
|  | 30, 60, -2   | Right superior frontal gyrus (orbital part)    |     | 4.2  |        |
|  | -12, 50, 42  | Left superior frontal gyrus                    | 33  | 4.51 |        |
|  | -18, 46, 38  |                                                |     | 3.78 |        |
|  | 36, -28, -20 | Right fusiform gyrus                           | 33  | 4.5  |        |
|  | -38, 22, 42  | Left middle frontal gyrus                      | 130 | 4.45 |        |
|  | -36, 34, 32  |                                                |     | 3.77 |        |
|  | -46, 14, 42  |                                                |     | 3.55 | 0.001  |
|  | 34, 20, 48   | Right middle frontal gyrus                     | 60  | 4.38 | <0.001 |
|  | 36, 14, 42   |                                                |     | 3.64 |        |
|  | 50, -10, 42  | Right precentral gyrus                         | 43  | 4.36 |        |
|  | 56, 24, 12   | Right inferior frontal gyrus (triangular part) | 189 | 4.32 |        |
|  | 44, 26, 26   |                                                |     | 4.24 |        |
|  | 56, 16, 28   | Right inferior frontal gyrus (opercular part)  |     | 4.05 |        |
|  | -28, -26, 70 | Left precentral gyrus                          | 161 | 4.3  |        |
|  | -22, -24, 62 |                                                |     | 4.04 |        |
|  | -16, -32, 74 | Left postcentral gyrus                         |     | 3.73 |        |
|  | 52, 6, 40    | Right precentral gyrus                         | 21  | 4.28 |        |
|  | 36, -28, 66  |                                                | 26  | 4.21 |        |
|  | -38, -10, 60 | Left precentral gyrus                          | 76  | 4.21 | 0.002  |
|  | -18, -6, 66  | Left supplementary motor area                  |     | 3.87 |        |
|  | -32, -10, 66 | Left precentral gyrus                          |     | 3.2  |        |
|  | 54, -60, -14 | Right inferior temporal gyrus                  | 73  | 4.2  | <0.001 |

|  |              |                                               |     |      |        |
|--|--------------|-----------------------------------------------|-----|------|--------|
|  | 60, -50, 0   | Right middle temporal gyrus                   |     | 3.66 |        |
|  | 6, -40, 40   | Right Median cingulate and paracingulate gyri | 55  | 4.18 |        |
|  | -58, 6, 18   | Left inferior frontal gyrus (opercular part)  | 106 | 4.18 |        |
|  | -54, 16, 8   | Left inferior frontal gyrus (triangular part) |     | 4.16 |        |
|  | -50, 14, -4  | Left temporal pole: superior temporal gyrus   |     | 3.77 |        |
|  | -24, -62, 58 | Left superior parietal gyrus                  | 94  | 4.16 |        |
|  | -20, -66, 48 |                                               |     | 3.74 |        |
|  | -22, -56, 50 |                                               |     | 3.58 | 0.001  |
|  | -16, 56, 26  | Left superior frontal gyrus                   | 20  | 4.15 |        |
|  | 40, 36, 36   | Right middle frontal gyrus                    | 21  | 4.11 | <0.001 |
|  | 28, -42, -6  | Right parahippocampal gyrus                   | 44  | 4.1  |        |
|  | 24, -50, -6  | Right lingual gyrus                           |     | 3.52 | 0.001  |
|  | 2, -56, 40   | Right precuneus                               | 56  | 4.07 |        |
|  | 0, -64, 46   | Left precuneus                                |     | 3.83 |        |
|  | 22, 48, 36   | Right superior frontal gyrus                  | 131 | 4.06 | <0.001 |
|  | 20, 54, 30   |                                               |     | 3.95 |        |
|  | 12, 48, 38   | Right superior frontal gyrus (medial part)    |     | 3.53 | 0.001  |
|  | 42, 38, -6   | Right inferior frontal gyrus (orbital part)   | 25  | 4.03 |        |
|  | -10, -72, 48 | Left precuneus                                | 37  | 3.98 | <0.001 |
|  | 32, -38, 44  | Right supramarginal gyrus                     | 103 | 3.97 |        |
|  | 38, -52, 56  | Right superior parietal gyrus                 |     | 3.59 |        |
|  | 30, -46, 62  | Right postcentral gyrus                       |     | 3.35 | 0.001  |
|  | -44, -2, 2   | Left Rolandic operculum                       | 39  | 3.96 |        |
|  | -46, 4, -8   | Left superior temporal gyrus                  |     | 3.8  |        |
|  | 42, -68, -10 | Right inferior occipital gyrus                | 34  | 3.92 |        |
|  | 22, -34, 66  | Right postcentral gyrus                       | 73  | 3.9  | <0.001 |
|  | 24, -26, 68  | Right precentral gyrus                        |     | 3.72 |        |
|  | -42, -22, 4  | Left superior temporal gyrus                  | 36  | 3.88 |        |
|  | -42, -14, 10 | Left Heschl's gyrus                           |     | 3.08 | 0.002  |
|  | 48, -46, 14  | Right superior temporal gyrus                 | 81  | 3.1  |        |
|  | -32, 46, 0   | Left middle frontal gyrus                     | 34  | 3.85 | <0.001 |

|  |               |                                                   |    |      |        |
|--|---------------|---------------------------------------------------|----|------|--------|
|  | -38, 52, -4   | Left middle frontal gyrus (orbital part)          |    | 3.36 | 0.001  |
|  | -2, -54, 60   | Left precuneus                                    | 70 | 3.85 | <0.001 |
|  | 6, -52, 50    | Right precuneus                                   |    | 3.38 | 0.001  |
|  | 2, -66, 56    |                                                   |    | 3.19 | 0.002  |
|  | -58, -10, 20  | Left postcentral gyrus                            | 47 | 3.8  | <0.001 |
|  | -62, -16, 30  |                                                   |    | 3.12 | 0.002  |
|  | -56, -38, -16 | Left inferior temporal gyrus                      | 43 | 3.48 | 0.001  |
|  | 26, 40, 42    | Right middle frontal gyrus                        | 24 | 3.79 | <0.001 |
|  | -34, -30, 46  | Left postcentral gyrus                            | 27 | 3.79 |        |
|  | -58, -30, 44  | Left inferior parietal gyrus                      | 45 | 3.78 |        |
|  | -58, -32, 36  | Left supramarginal gyrus                          |    | 3.55 | 0.001  |
|  | 16, -66, 50   | Right superior parietal gyrus                     | 32 | 3.76 | <0.001 |
|  | 10, -68, 42   | Right precuneus                                   |    | 3.23 | 0.001  |
|  | -14, 12, 64   | Left supplementary motor area                     | 56 | 3.66 | <0.001 |
|  | -20, 8, 56    | Left superior frontal gyrus                       |    | 3.53 | 0.001  |
|  | -46, 28, 26   | Left inferior frontal gyrus (triangular part)     | 21 | 3.64 | <0.001 |
|  | 64, -20, -18  | Right middle temporal gyrus                       | 21 | 3.63 |        |
|  | -44, -42, -16 | Left inferior temporal gyrus                      | 33 | 3.57 | 0.001  |
|  | 0, 58, -10    | Left superior frontal gyrus (medial orbital part) | 26 | 3.49 |        |
|  | -4, 60, -4    | Left superior frontal gyrus (medial orbital part) | 27 | 3.45 |        |
|  | 0, 62, 4      | Left superior frontal gyrus (medial part)         |    | 3.03 |        |
|  | -10, 36, 50   | Left superior frontal gyrus (medial part)         | 21 | 3.31 | 0.001  |

These results were obtained at a peak-level threshold of uncorrected  $p < 0.005$  with an extent threshold of 20 voxels. BP<sub>ND</sub>, binding potential with respect to non-displaceable compartment; MNI, Montreal Neurological Institute.

**Supplementary Table S3.** Sex differences in [<sup>11</sup>C]MDL100907 BP<sub>ND</sub>

| <b>Contrast</b> | <b>MNI coordinate (x, y, z)</b> | <b>Brain region</b>         | <b>Cluster size (voxels)</b> | <b>T value</b> | <b>p value</b> |
|-----------------|---------------------------------|-----------------------------|------------------------------|----------------|----------------|
| Men > Women     | -40, -2, 50                     | Left precentral gyrus       | 53                           | 5.26           | <0.001         |
|                 | -34, -10, 46                    |                             |                              | 3.22           | 0.001          |
|                 | 56, -60, 24                     | Right angular gyrus         | 40                           | 4.42           | <0.001         |
|                 | 52, -60, 32                     |                             |                              | 3.6            | 0.001          |
|                 | 38, 12, 56                      | Right middle frontal gyrus  | 21                           | 4.25           | <0.001         |
|                 | 32, 12, -4                      | Right putamen               | 21                           | 3.98           |                |
|                 | 44, -68, 8                      | Right middle temporal gyrus | 45                           | 3.96           |                |
|                 | -50, 6, 38                      | Left precentral gyrus       | 32                           | 3.94           | 0.001          |
|                 | -52, 4, 30                      |                             |                              | 3.51           |                |
|                 | -34, -18, -26                   | Left fusiform gyrus         | 24                           | 3.6            |                |
| Women > Men     | 4 -94 10                        | Right calcarine gyrus       | 45                           | 4.43           | <0.001         |
|                 | 4 -90 24                        | Right cuneus                |                              | 2.84           | 0.004          |

These results were presented at a peak-level threshold of uncorrected  $p < 0.005$  with an extent threshold of 20 voxels. BP<sub>ND</sub>, binding potential with respect to non-displaceable compartment; MNI, Montreal Neurological Institute.

### ***The region of interest (ROI)-based correlation analysis***

Based on parameter estimation by kinetic modeling implemented in PMOD software v4.2 (PMOD Technologies Ltd., Zürich, Switzerland), the binding potential with respect to non-displaceable compartment ( $BP_{ND}$ ) values of [ $^{11}C$ ]MDL100907 were obtained using a basis function implementation of the simplified reference tissue model [1,2] with cerebellar gray matter as the reference region. In the [ $^{11}C$ ] MDL100907  $BP_{ND}$  calculation step, regional time-activity curves were extracted from spatially normalized positron emission tomography frames by averaging all voxels within automated anatomical labeling (AAL) [3] atlas-based brain regions containing clusters that showed statistical significance in voxel-based correlation analysis. These AAL atlas-based brain regions included the bilateral superior frontal gyrus (SFG), medial part of right SFG, orbital part of left SFG, medial orbital part of left SFG, left gyrus rectus, left olfactory gyrus, left middle temporal gyrus (MTG), left inferior temporal gyrus, left angular gyrus, left fusiform gyrus, temporal pole of right MTG, right anterior cingulate and paracingulate gyri, right hippocampus, and right parahippocampal gyrus.

To complement the voxel-based results on the relationship between aggression trait and [ $^{11}C$ ] MDL100907  $BP_{ND}$  in specific brain regions, we also performed an ROI-based correlation analysis with age and sex as covariates with the same data using the Statistical Package for the Social Sciences v28.0 (IBM Corp., Armonk, NY, USA). Significant results were identified at a threshold of two-tailed  $p < 0.05$ .

### **References**

1. Lammertsma, A.A.; Hume, S.P. Simplified Reference Tissue Model for PET Receptor Studies. *NeuroImage* **1996**, *4*, 153–158, doi:[10.1006/nimg.1996.0066](https://doi.org/10.1006/nimg.1996.0066).
2. Gunn, R.N.; Lammertsma, A.A.; Hume, S.P.; Cunningham, V.J. Parametric Imaging of Ligand-Receptor Binding in PET Using a Simplified Reference Region Model. *NeuroImage* **1997**, *6*, 279–287, doi:[10.1006/nimg.1997.0303](https://doi.org/10.1006/nimg.1997.0303).
3. Tzourio-Mazoyer, N.; Landeau, B.; Papathanassiou, D.; Crivello, F.; Etard, O.; Delcroix, N.; Mazoyer, B.; Joliot, M. Automated Anatomical Labeling of Activations in SPM Using a Macroscopic Anatomical Parcellation of the MNI MRI Single-Subject Brain. *NeuroImage* **2002**, *15*, 273–289, doi:[10.1006/nimg.2001.0978](https://doi.org/10.1006/nimg.2001.0978).

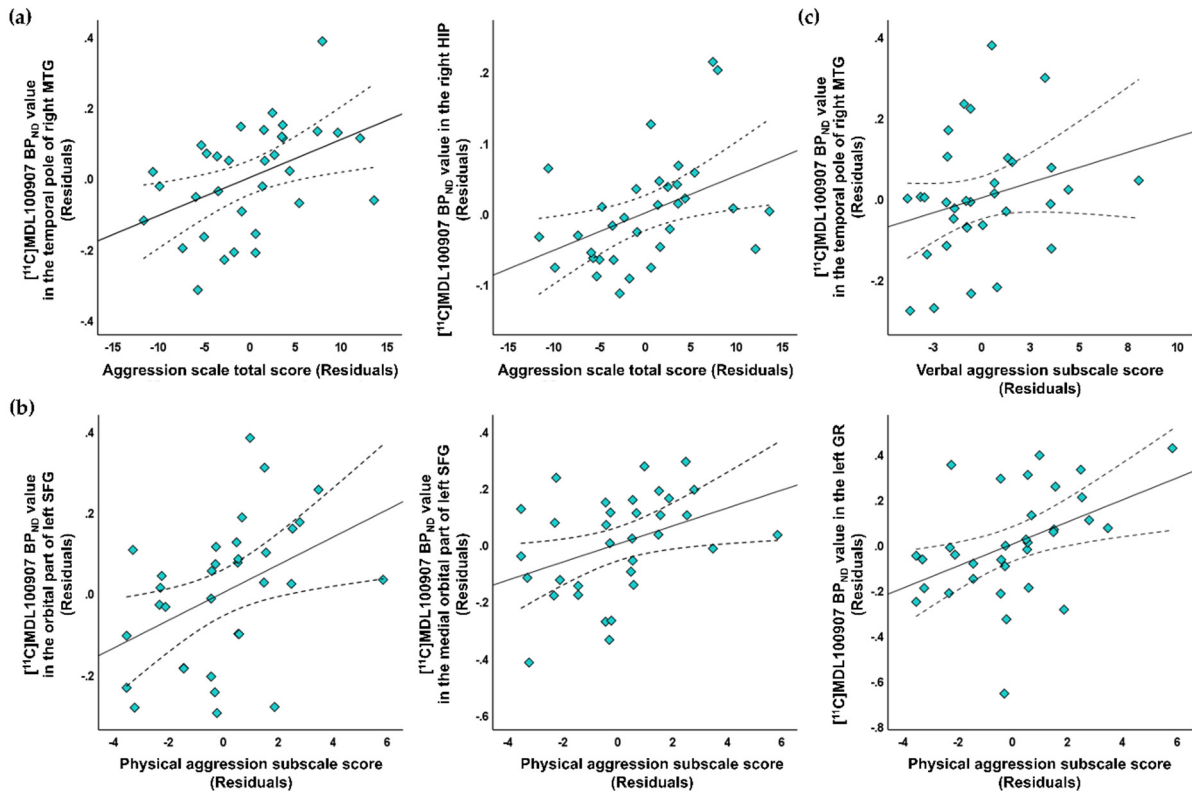

**Supplementary Figure S1.** Scatter plots showing the ROI-based partial correlations between the aggression scores and  $[^{11}\text{C}]\text{MDL100907 BP}_{\text{ND}}$  in AAL atlas-based brain regions. (a) The aggression scale total score had significant positive correlations with  $[^{11}\text{C}]\text{MDL100907 BP}_{\text{ND}}$  in the temporal pole of right MTG ( $r = 0.447$ ,  $p = 0.012$ ) and right HIP ( $r = 0.429$ ,  $p = 0.016$ ). (b) The physical aggression subscale score had significant positive correlations with  $[^{11}\text{C}]\text{MDL100907 BP}_{\text{ND}}$  in the orbital part of left SFG ( $r = 0.425$ ,  $p = 0.017$ ), medial orbital part of left SFG ( $r = 0.387$ ,  $p = 0.032$ ), and left GR ( $r = 0.444$ ,  $p = 0.012$ ). (c) The verbal aggression subscale score had a significant positive correlation with  $[^{11}\text{C}]\text{MDL100907 BP}_{\text{ND}}$  in the temporal pole of right MTG ( $r = 0.382$ ,  $p = 0.034$ ). The mint rhombi represent ordered pairs of the unstandardized residuals calculated from two separate linear regressions of the aggression scores and  $[^{11}\text{C}]\text{MDL100907 BP}_{\text{ND}}$  in specific brain regions in regard to age and sex. The solid and dotted lines indicate the regression lines and 95% confidence intervals, respectively. ROI, region of interest;  $\text{BP}_{\text{ND}}$ , binding potential with respect to non-displaceable compartment; AAL, automated anatomical labeling; MTG, middle temporal gyrus; HIP, hippocampus; SFG, superior frontal gyrus; GR, gyrus rectus.
